# Supplementary material for: A green electrochemical transformation of inferior coals to crystalline graphite for stable Li-ion storage
Source: Royal Society of Chemistry journal article supplement (doi:10.1039/c8ta12412d), 2019-01-01
Supplement: c8ta12412d1.pdf [file c8ta12412d1.pdf]

## Supporting Information

### **A green electrochemical transformation of inferior coals to crystalline graphite for stable Li ion storage**

Zhenglu Zhu,<sup>a</sup> Haibin Zuo,<sup>\*a</sup> Shijie Li,<sup>a</sup> Jiguo Tu,<sup>a</sup> Wei Guan,<sup>a</sup> Wei-Li Song,<sup>\*b</sup> Jun Zhao,<sup>a</sup>

Donghua Tian<sup>a</sup> and Shuqiang Jiao<sup>\*a</sup>

<sup>a</sup> *State Key Laboratory of Advanced Metallurgy, University of Science and Technology Beijing, 100083, P R China.*

<sup>b</sup> *Institute of Advanced Structure Technology, Beijing Institute of Technology, Beijing 100081, P R China*

<sup>\*</sup> *E-mails: zuohaibin@ustb.edu.cn (H Zuo), weilis@bit.edu.cn (W.L. Song), sjiao@ustb.edu.cn (S Jiao)*

**Table S1.** Proximate (dry basis, db) and elemental (dry ash-free basis, daf) analyses of KL coal.

|                              | <b>KL-RAW</b> | <b>KL-HPC</b> |
|------------------------------|---------------|---------------|
| Proximate analyses(wt%, db)  |               |               |
| Ash                          | 10.37         | 0.49          |
| Volatile matter              | 32.2          | 49.51         |
| Elemental analyses(wt%, daf) |               |               |
| Carbon                       | 83.25         | 82.49         |
| Hydrogen                     | 5.37          | 5.50          |
| Nitrogen                     | 1.8           | 4.31          |
| sulfur                       | 1.09          | 0.55          |
| Oxygen                       | 8.49          | 7.15          |

**Table S2.** Abbreviations of samples under different conditions.

| <b>Sample</b>  | <b>Abbreviation</b> |
|----------------|---------------------|
| KL RAW coal    | RC                  |
| HyperCoal      | HPC                 |
| 850°C-2.6V-10h | EG1                 |
| 900°C-2.6V-10h | EG2                 |
| 950°C-2.2V-10h | EG3                 |
| 950°C-2.4V-10h | EG4                 |
| 950°C-2.6V-2h  | EG5                 |
| 950°C-2.6V-4h  | EG6                 |
| 950°C-2.6V-6h  | EG7                 |

**Table S3.** The carbon recovery after electrolysis of 0.85g HPC in CaCl<sub>2</sub> under different conditions

| Electrode potential | Electrolysis time | Carbon recovery |
|---------------------|-------------------|-----------------|
| no potential        | 20                | 91%             |
| EG1                 | 10 h              | 68%             |
| EG2                 | 10 h              | 60%             |
| EG3                 | 10 h              | 65%             |
| EG4                 | 10 h              | 62%             |
| EG5                 | 2 h               | 79%             |
| EG6                 | 4 h               | 75%             |
| EG7                 | 6 h               | 52%             |

\* The decrease in yield is attributed to the removal of oxygen, the drop of HPC into the molten salt during electrolysis and the mass loss during the washing process.

**Table S4.** Structural parameters of HPC and synthetic graphite structure EG7.

| <b>samples</b> | <b>BET surface Area (m<sup>2</sup>/g)</b> | <b>Total pore volume (cc/g)</b> | <b>Mesopore Volume (cc/g)</b> | <b>Mesopore diameter (nm)</b> |
|----------------|-------------------------------------------|---------------------------------|-------------------------------|-------------------------------|
| HPC            | 25.454                                    | /                               | 0.07402                       | 2.191                         |
| EG7            | 131.180                                   | 0.1092                          | 0.0605                        | 3.407                         |

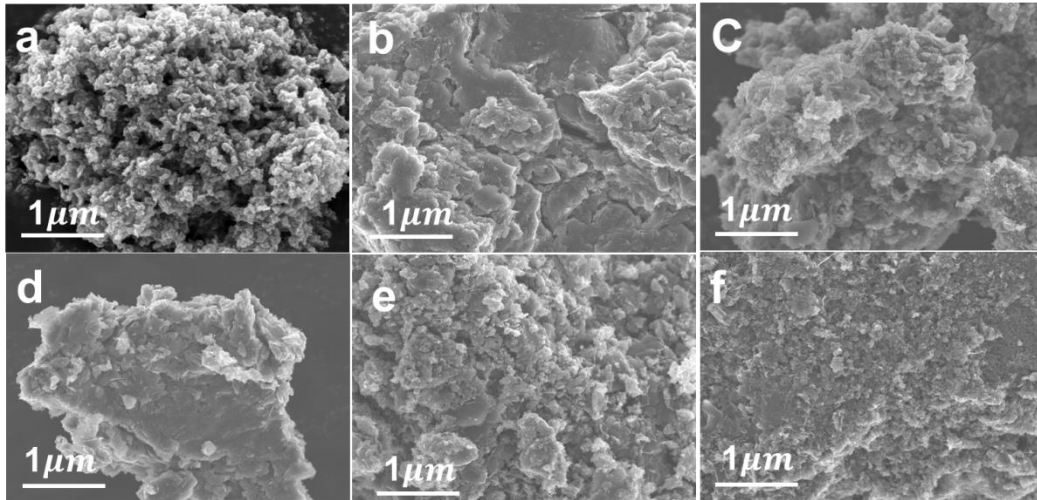

**Fig. S1** SEM images of the obtained products at different conditions in  $\text{CaCl}_2$ . (a) EG1. (b) EG2. (c) EG3. (d) EG4. (e) EG5. (f) EG6.

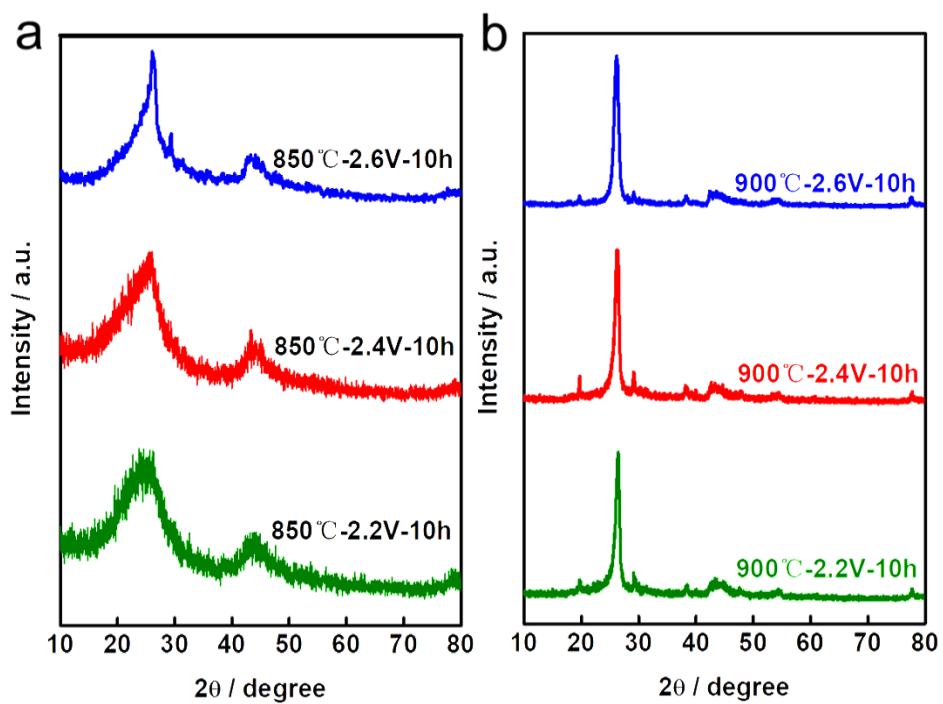

**Fig. S2** XRD patterns of electrolyzed HPC under different voltages as indicated at 850 °C and 900 °C.

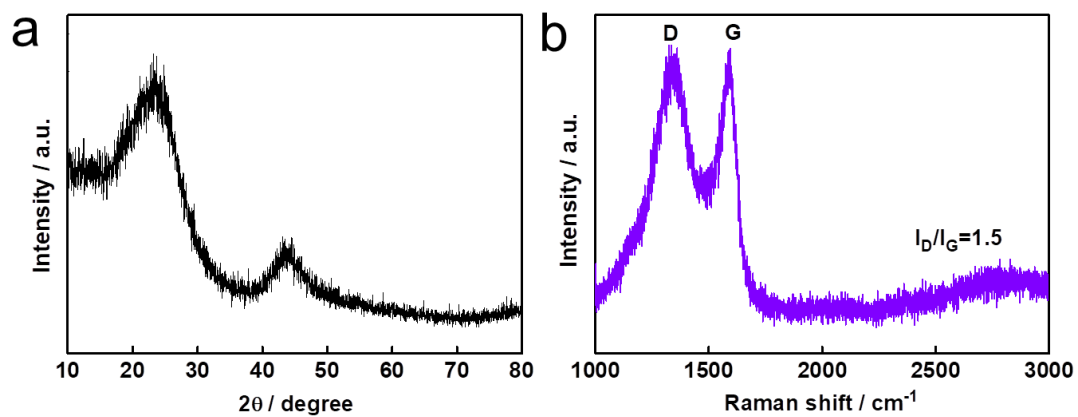

**Fig. S3** (a) XRD pattern and (b) Raman spectra of pyrolytic HPC at 850°C for 20 h.



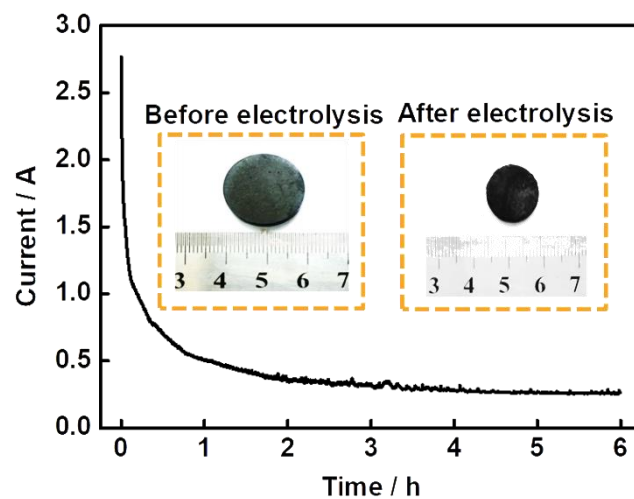

**Fig. S4** Current response under 2.6V at 950°C for 6h.

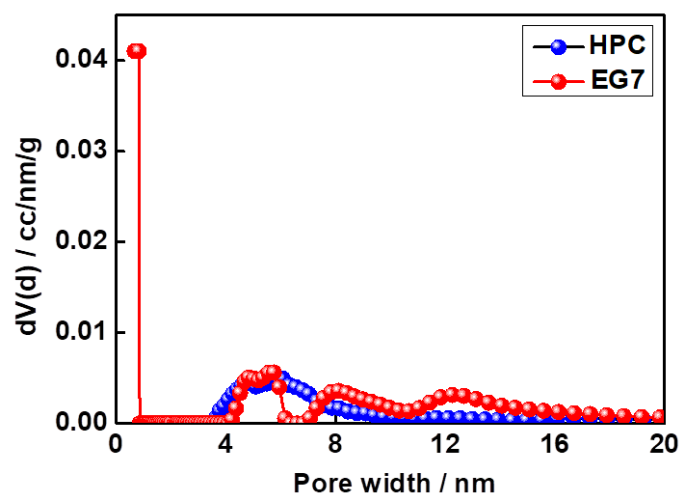

**Fig. S5** Pore size distribution (PSD) curves of HPC and EG7.

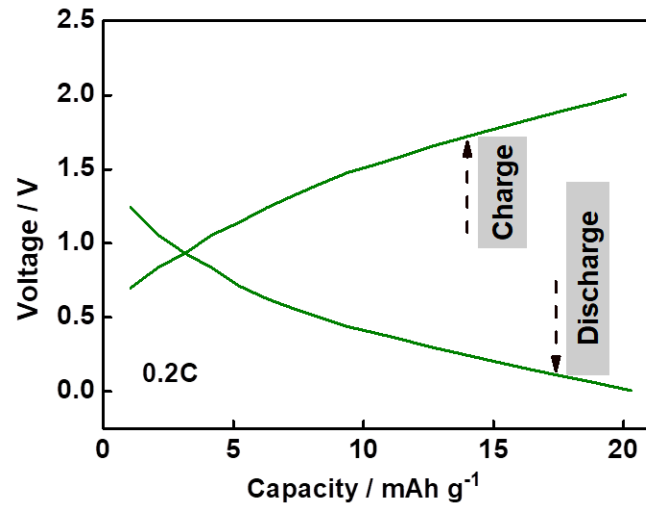

**Fig. S6** Galvanostatic charge/discharge measurement (GCD) curve of HPC at a rate of 0.2C.

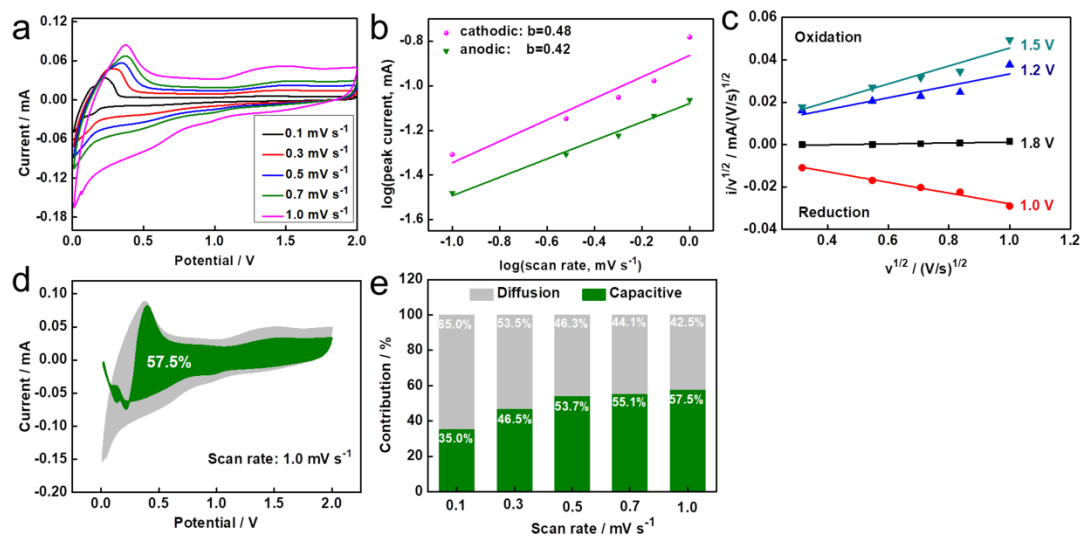

**Fig. S7** (a) CV curves of graphite electrode at different scan rates from 0.1 to 1 mV s<sup>-1</sup>. (b) Determination of b values using the relationship between the peak current and the scan rate. (c) Plots of  $v^{1/2}$  vs.  $i/v^{1/2}$  at different redox states for obtaining constants  $k_1$  and  $k_2$ , respectively. (d) The capacitive contribution at a scan rate of 1 mV s<sup>-1</sup>. (e) Contribution ratio of the capacitive- and diffusion-controlled charge versus scan rate.

**Supplementary method S1:** Calculation of the capacitance contribution.

The current with scan rate in the CV test obeys the power law as below:

$$i = av^b \quad (1)$$

$$\log(i) = b \log(v) + \log a \quad (2)$$

where value  $b$  can be obtained from the slope of  $\log(i)$  versus  $\log(v)$  plot. Similarly, Equation (1) can be divided into two sections through the method proposed by Dunn and co-workers, as follows:

$$i = k_1 v + k_2 v^{1/2} \quad (3)$$

$$i/v^{1/2} = k_1 v^{1/2} + k_2 \quad (4)$$

where  $k_1$  and  $k_2$  are constants. The values of  $k_1$  and  $k_2$  can be obtained by the slope and intercept of  $i/v^{1/2}$  versus  $v^{1/2}$  plot, respectively. By applying  $k_1$  and  $k_2$  values at different voltages in  $k_1 v$  and  $k_2 v^{1/2}$ , the capacitive and diffusion-controlled currents can be determined.
